# Supplementary material for: MicroRNAs tend to synergistically control expression of genes encoding extensively-expressed proteins in humans
Source: PeerJ. 2017 Aug 14;5:e3682. doi: 10.7717/peerj.3682 (PMC5560240; doi:10.7717/peerj.3682)
Supplement: Table S3 [file peerj-05-3682-s003.xlsx]

## Sheet: Sheet1
Table S3. Result of gene ontology (GO) analysis by using DAVID.
Coefficient of variation	Category	Term	Count	False discovery rate (FDR)
< 40%	GOTERM_BP_FAT	GO:0045449~regulation of transcription	331	5.79914e-18
		GO:0006350~transcription	264	3.41949e-12
		GO:0006357~regulation of transcription from RNA polymerase II promoter	119	5.1581e-11
		GO:0045941~positive regulation of transcription	99	1.40621e-10
		GO:0010628~positive regulation of gene expression	99	9.16289e-10
		GO:0045893~positive regulation of transcription, DNA-dependent	86	1.71532e-09
		GO:0051252~regulation of RNA metabolic process	226	1.93351e-09
		GO:0051254~positive regulation of RNA metabolic process	86	2.74865e-09
		GO:0045935~positive regulation of nucleobase, nucleoside, nucleotide and nucleic acid metabolic process	102	5.23942e-09
		GO:0051173~positive regulation of nitrogen compound metabolic process	104	6.72102e-09
		GO:0010557~positive regulation of macromolecule biosynthetic process	105	7.39172e-09
		GO:0031328~positive regulation of cellular biosynthetic process	107	2.51694e-08
		GO:0009891~positive regulation of biosynthetic process	107	6.14883e-08
		GO:0006355~regulation of transcription, DNA-dependent	215	1.26116e-07
		GO:0010604~positive regulation of macromolecule metabolic process	122	3.82021e-07
		GO:0045944~positive regulation of transcription from RNA polymerase II promoter	67	7.11557e-07
		GO:0006325~chromatin organization	65	1.02095e-05
		GO:0051276~chromosome organization	77	1.31896e-05
		GO:0008380~RNA splicing	53	1.95904e-05
		GO:0006259~DNA metabolic process	78	3.8698e-05
		GO:0016071~mRNA metabolic process	62	6.41808e-05
		GO:0010629~negative regulation of gene expression	77	7.08796e-05
		GO:0006397~mRNA processing	56	8.09176e-05
		GO:0016568~chromatin modification	50	0.000112711
		GO:0016481~negative regulation of transcription	70	0.000344655
		GO:0007049~cell cycle	102	0.00082007
		GO:0016265~death	96	0.00128328
		GO:0010605~negative regulation of macromolecule metabolic process	97	0.00130035
		GO:0008219~cell death	95	0.00176112
		GO:0000377~RNA splicing, via transesterification reactions with bulged adenosine as nucleophile	32	0.00198102
		GO:0000375~RNA splicing, via transesterification reactions	32	0.00198102
		GO:0000398~nuclear mRNA splicing, via spliceosome	32	0.00198102
		GO:0010558~negative regulation of macromolecule biosynthetic process	77	0.00204834
		GO:0031327~negative regulation of cellular biosynthetic process	78	0.00276741
		GO:0006396~RNA processing	76	0.00399945
		GO:0044265~cellular macromolecule catabolic process	94	0.00453783
		GO:0045934~negative regulation of nucleobase, nucleoside, nucleotide and nucleic acid metabolic process	72	0.00494331
		GO:0009890~negative regulation of biosynthetic process	78	0.00629829
		GO:0051172~negative regulation of nitrogen compound metabolic process	72	0.00807097
		GO:0051253~negative regulation of RNA metabolic process	55	0.00941524
		GO:0045892~negative regulation of transcription, DNA-dependent	54	0.0121939
		GO:0006511~ubiquitin-dependent protein catabolic process	41	0.0137174
		GO:0010608~posttranscriptional regulation of gene expression	37	0.0188574
		GO:0012501~programmed cell death	80	0.0198766
		GO:0006915~apoptosis	79	0.020839
		GO:0032583~regulation of gene-specific transcription	27	0.0321942
		GO:0009057~macromolecule catabolic process	96	0.0327039
		GO:0051603~proteolysis involved in cellular protein catabolic process	78	0.0336543
		GO:0042981~regulation of apoptosis	98	0.0373993
		GO:0030163~protein catabolic process	80	0.0380381
		GO:0044257~cellular protein catabolic process	78	0.0398684
		GO:0033554~cellular response to stress	74	0.0464304
		GO:0006974~response to DNA damage stimulus	54	0.0465137
	GOTERM_CC_FAT	GO:0031981~nuclear lumen	252	2.84575e-41
		GO:0070013~intracellular organelle lumen	284	3.50568e-40
		GO:0043233~organelle lumen	287	1.22868e-39
		GO:0031974~membrane-enclosed lumen	288	2.13041e-38
		GO:0005730~nucleolus	140	7.54796e-27
		GO:0043228~non-membrane-bounded organelle	315	1.07287e-21
		GO:0043232~intracellular non-membrane-bounded organelle	315	1.07287e-21
		GO:0005654~nucleoplasm	147	8.91226e-20
		GO:0044451~nucleoplasm part	90	4.63729e-10
		GO:0005694~chromosome	73	3.02967e-07
		GO:0005829~cytosol	151	9.76361e-06
		GO:0000785~chromatin	40	1.174e-05
		GO:0044427~chromosomal part	58	0.000196465
		GO:0016604~nuclear body	32	0.00141169
		GO:0016585~chromatin remodeling complex	19	0.00264152
		GO:0005681~spliceosome	27	0.00296537
		GO:0030529~ribonucleoprotein complex	67	0.00395035
		GO:0070603~SWI/SNF-type complex	9	0.00411313
		GO:0016514~SWI/SNF complex	9	0.00411313
		GO:0017053~transcriptional repressor complex	14	0.0048601
		GO:0042470~melanosome	21	0.00548113
		GO:0048770~pigment granule	21	0.00548113
		GO:0005819~spindle	28	0.00765334
		GO:0030530~heterogeneous nuclear ribonucleoprotein complex	9	0.0136414
		GO:0000228~nuclear chromosome	29	0.0171733
		GO:0005667~transcription factor complex	34	0.0238027
		GO:0000790~nuclear chromatin	15	0.0349812
		GO:0016363~nuclear matrix	15	0.0435925
	GOTERM_MF_FAT	GO:0030528~transcription regulator activity	210	1.05471e-12
		GO:0003677~DNA binding	287	1.37113e-11
		GO:0003723~RNA binding	118	1.42719e-10
		GO:0008134~transcription factor binding	91	2.02097e-09
		GO:0016563~transcription activator activity	77	7.8327e-09
		GO:0000166~nucleotide binding	256	2.92952e-06
		GO:0003712~transcription cofactor activity	61	0.000122756
		GO:0016564~transcription repressor activity	55	0.000180676
		GO:0003713~transcription coactivator activity	41	0.000756457
		GO:0003702~RNA polymerase II transcription factor activity	43	0.00380208
		GO:0010843~promoter binding	17	0.0120317
		GO:0003700~transcription factor activity	118	0.012624
		GO:0002039~p53 binding	9	0.0363762
> 120%	GOTERM_BP_FAT	GO:0001775~cell activation	45	7.15191e-05
		GO:0007155~cell adhesion	80	0.000551023
		GO:0022610~biological adhesion	80	0.000574381
		GO:0042060~wound healing	32	0.00211206
		GO:0045321~leukocyte activation	37	0.00256552
		GO:0046649~lymphocyte activation	32	0.00516306
		GO:0042110~T cell activation	23	0.022766
		GO:0032989~cellular component morphogenesis	48	0.0445901
	GOTERM_CC_FAT	GO:0044459~plasma membrane part	215	8.9986e-09
		GO:0005886~plasma membrane	322	1.58627e-07
		GO:0030017~sarcomere	22	0.000892133
		GO:0030016~myofibril	23	0.00198061
		GO:0000267~cell fraction	107	0.00392346
		GO:0005887~integral to plasma membrane	115	0.00408119
		GO:0031226~intrinsic to plasma membrane	116	0.00703535
		GO:0045202~synapse	46	0.00847441
		GO:0043292~contractile fiber	23	0.00880406
		GO:0044433~cytoplasmic vesicle part	30	0.00882335
		GO:0044449~contractile fiber part	22	0.00998996
		GO:0009986~cell surface	45	0.0115045
		GO:0019717~synaptosome	18	0.0273034
		GO:0016023~cytoplasmic membrane-bounded vesicle	61	0.0315537
		GO:0005604~basement membrane	17	0.0343077
		GO:0030136~clathrin-coated vesicle	23	0.0368619
		GO:0031988~membrane-bounded vesicle	62	0.0436136
	GOTERM_MF_FAT	GO:0008092~cytoskeletal protein binding	57	0.0173992
		GO:0003779~actin binding	41	0.0348031
